# Supplementary material for: Allele-Biased Expression in Differentiating Human Neurons: Implications for Neuropsychiatric Disorders
Source: PLoS One. 2012 Aug 30;7(8):e44017. doi: 10.1371/journal.pone.0044017 (PMC3431331; doi:10.1371/journal.pone.0044017)
Supplement: Table S2 — allele-biased genes in undifferentiated iPSCs. (XLS) [file pone.0044017.s004.xls]

## Sheet: Sheet1
gene	chrom	start	end	# of SNPs >10 reads	# of significant SNPs	# significant SNPs/# total SNPs	FPKM
EDA	chrX	68835911	69259319	14	14	1	18.5559
AC124303.3	chr15	25224704	25620623	10	9	0.9	4.1562
GPC4	chrX	132434131	132549518	10	9	0.9	213.064
USP9X	chrX	40944888	41092185	8	7	0.875	2674.21
KAL1	chrX	8496915	8700227	6	6	1	58.5678
GPM6B	chrX	13789150	13956757	5	5	1	168.292
RP13-188A5.1	chrX	55934556	56041606	4	4	1	18.6926
XIAP	chrX	122993574	123047829	4	4	1	31.3826
RP11-129K20.2	chr3	62936105	63110738	4	4	1	16.5012
CHM	chrX	85116185	85302566	4	4	1	69.3177
CASK	chrX	41374187	41782716	4	4	1	403.347
RP11-83M16.6	chr5	66995257	67198428	10	4	0.4	7.09787
STAG2	chrX	123094062	123556514	5	4	0.8	289.151
MEG3	chr14	101292455	101327358	3	3	1	1150.92
NLGN4X	chrX	5758678	6146904	30	3	0.1	129.5
RP11-434D9.1	chr5	66675206	67101066	4	3	0.75	32.1024
P4HA2	chr5	131527531	131631008	2	2	1	41.8698
XIST	chrX	73040486	73072588	2	2	1	8135.36
SMS	chrX	21958691	22025798	4	2	0.5	357.566
RBMS1	chr2	161128662	161350305	3	2	0.666667	137.192
EIF2S3	chrX	24072833	24096088	2	2	1	442.311
TBL1X	chrX	9431335	9687780	2	2	1	63.7784
LRRTM4	chr2	76974845	77820445	19	2	0.105263	95.181
HS6ST2	chrX	131760038	132095423	2	2	1	35.8851
CSMD2	chr1	33979609	34631443	6	2	0.333333	11.113
FBXW8	chr12	117348761	117470180	4	2	0.5	25.289
KIAA1267	chr17	44107334	44270166	31	2	0.0645161	81.7387
POLA1	chrX	24712036	25015103	2	2	1	218.508
CD99L2	chrX	149934810	150067289	2	2	1	11.4329
PSD3	chr8	18384811	18942240	14	2	0.142857	99.9426
RBM41	chrX	106307650	106362057	2	2	1	296.423
ZNF385D	chr3	21459915	22414812	24	2	0.0833333	42.5417
AP3B1	chr5	77296349	77590579	4	2	0.5	330.975
SPINK5	chr5	147405246	147516852	3	2	0.666667	69.0084
RP11-479I1.4	chrX	24091379	24095525	2	2	1	442.311
ACSL4	chrX	108872579	108976632	2	2	1	96.8149
APOOL	chrX	84258832	84344972	2	2	1	91.7955
RP3-399L15.3	chr6	114290865	114792869	13	1	0.0769231	364.897
PCSK5	chr9	78505560	78977255	1	1	1	14.6018
RP11-266F12.1	chr7	53255081	53256631	1	1	1	244.355
DLG2	chr11	83166055	85338966	13	1	0.0769231	85.0582
METTL13	chr1	171750788	171783163	1	1	1	93.2432
OFD1	chrX	13752832	13787480	1	1	1	208.437
TMEM53	chr1	45100910	45140227	2	1	0.5	48.585
MAEA	chr4	1283639	1333935	1	1	1	53.901
SLITRK4	chrX	142710596	142723596	1	1	1	17.9616
DEPDC1B	chr5	59892739	59996017	1	1	1	258.324
GK	chrX	30671476	30748725	1	1	1	5.63319
ZNF677	chr19	53727087	53758126	2	1	0.5	19.102
L2HGDH	chr14	50704281	50778947	1	1	1	29.959
TRAPPC2	chrX	13730363	13752754	1	1	1	34.8814
GPR113	chr2	26531041	26569685	1	1	1	15.3542
CAPZB	chr1	19665267	19812066	2	1	0.5	208.43
RP11-296E7.1	chr6	80774002	80777854	1	1	1	52.6251
CHKA	chr11	67820326	67888736	3	1	0.333333	50.0615
WDR44	chrX	117480036	117590949	1	1	1	214.211
CCT3	chr1	156278759	156337664	2	1	0.5	1143.25
PSMG1	chr21	40546695	40555777	2	1	0.5	724.205
OPCML	chr11	132284871	133402414	5	1	0.2	7.09568
RP11-622K12.1	chrX	56755677	56844813	1	1	1	184.06
FRAS1	chr4	78978724	79465423	35	1	0.0285714	241.465
THSD4	chr15	71389291	72075722	6	1	0.166667	7.64507
FAM199X	chrX	103411301	103440583	1	1	1	49.6078
RPRD2	chr1	150335567	150449042	2	1	0.5	114.709
ARNT2	chr15	80696692	80890278	1	1	1	4.75827
GSTO2	chr10	106028631	106059616	2	1	0.5	65.5713
C5orf17	chr5	23951457	24178372	1	1	1	3.21814
ZNRF3	chr22	29279580	29453475	5	1	0.2	15.5417
TTC37	chr5	94799599	94890711	3	1	0.333333	329.31
GOSR2	chr17	45000486	45105003	2	1	0.5	34.164
KIAA1370	chr15	52873530	52970820	2	1	0.5	12.2366
TPI1P1	chr1	77165474	77166223	1	1	1	158.087
SMAD2	chr18	45357922	45457515	3	1	0.333333	116.195
SHROOM2	chrX	9754496	9917483	1	1	1	25.2765
AMMECR1L	chr2	128619204	128643496	1	1	1	24.6433
AKAP13	chr15	85777817	86292586	3	1	0.333333	135.622
NDUFAF2	chr5	60240956	60448853	4	1	0.25	164.493
LHFPL1	chrX	111873876	111923375	1	1	1	10.9481
AC108058.1	chr2	105990550	105992540	1	1	1	8.65787
LCOR	chr10	98592017	98740800	2	1	0.5	274.831
ELL2	chr5	95220802	95297775	2	1	0.5	114.975
PARVA	chr11	12398732	12552348	1	1	1	23.5882
SPATS2L	chr2	201170604	201343253	1	1	1	356.848
WBSCR17	chr7	70597155	71178585	8	1	0.125	34.7425
TCFL5	chr20	61472467	61493115	1	1	1	16.0549
PLCL2	chr3	16844159	17132094	12	1	0.0833333	106.612
CXorf24	chrX	47342970	47344207	1	1	1	24.1359
C3orf17	chr3	112721287	112738708	2	1	0.5	308.699
TAF1B	chr2	9983483	10074537	5	1	0.2	125.465
GEMIN8	chrX	14026398	14048012	1	1	1	20.0892
SEMA5A	chr5	9035138	9546187	1	1	1	23.2107
BMPR1A	chr10	88516396	88684945	8	1	0.125	303.496
AC005062.2	chr7	19958604	20180076	11	1	0.0909091	826.232
ATAD2B	chr2	23971534	24149984	4	1	0.25	91.738
CAT	chr11	34460472	34493609	1	1	1	33.6508
ARL10	chr5	175792471	175828866	1	1	1	8.35853
ZNF492	chr19	22817126	22850472	1	1	1	21.0614
AP1S2	chrX	15843929	15873054	3	1	0.333333	552.044
OPHN1	chrX	67262186	67653755	1	1	1	24.6558
KIF4A	chrX	69509879	69640682	1	1	1	242.582
AC005042.4	chr2	159514849	159591514	1	1	1	7.80945
RP5-964N17.1	chrX	112859587	112861440	1	1	1	32.012
EFR3A	chr8	132916335	133025889	4	1	0.25	85.5672
KLF8	chrX	56258854	56314322	1	1	1	28.4181
CCT8P1	chr1	146674871	146676513	1	1	1	299.245
DMXL1	chr5	118373467	118584833	1	1	1	180.284
AL132709.9	chr14	101427364	101433377	1	1	1	175.887
AL132709.8	chr14	101427163	101432103	1	1	1	175.887
C9orf156	chr9	100666771	100684852	1	1	1	20.1771
ANK2	chr4	113739265	114309884	20	1	0.05	178.692
C9orf93	chr9	15552895	16061661	3	1	0.333333	35.7699
FUT9	chr6	96463860	96653420	6	1	0.166667	14.0915
ZNF397	chr18	32820994	32839191	3	1	0.333333	90.9019
RP11-570P14.1	chr1	44587825	44588184	1	1	1	1510.71
TUSC3	chr8	15274724	15624158	8	1	0.125	237.354
HNRPLL	chr2	38789120	38830728	1	1	1	101.567
RCBTB1	chr13	50106082	50159719	5	1	0.2	207.683
RP11-761E20.1	chrX	115032519	115085422	1	1	1	33.4808
MIPEP	chr13	24304328	24463558	1	1	1	41.3353
DYRK1A	chr21	38739236	38887680	6	1	0.166667	131.176
ZFP64	chr20	50668202	50820847	2	1	0.5	56.2032
C2orf56	chr2	37458774	37480546	1	1	1	356.18
SPIN3	chrX	57002815	57021988	1	1	1	35.6658
JAKMIP2	chr5	146967990	147162338	18	1	0.0555556	151.415
CEP192	chr18	12991361	13125051	2	1	0.5	101.596
CGNL1	chr15	57668703	57842925	7	1	0.142857	98.5632
CACHD1	chr1	64936428	65158741	3	1	0.333333	222.774
NRG3	chr10	83634806	84746933	8	1	0.125	12.7572
PTTG1IP	chr21	46269500	46293752	2	1	0.5	195.826
NRXN1	chr2	50145643	51259674	9	1	0.111111	121.01
LSAMP	chr3	115528641	117716095	7	1	0.142857	40.5599
PAK2	chr3	196466728	196559518	3	1	0.333333	116.084
YIPF6	chrX	67718165	67757127	1	1	1	158.069
FAM73A	chr1	78245309	78344106	1	1	1	20.3038
CNTN4	chr3	2140497	3099645	1	1	1	2.45481
RP3-368A4.3	chrX	73422669	73424477	1	1	1	62.7814
EXO1	chr1	242011269	242058450	5	1	0.2	191.517
PRKG1	chr10	52750945	54058110	16	1	0.0625	53.366
CAMTA1	chr1	6845384	7829764	8	1	0.125	658.637
PDE5A	chr4	120415550	120550146	6	1	0.166667	77.7472
FARP1	chr13	98795434	99102023	3	1	0.333333	224.292
UBE2E3	chr2	181831975	181941312	7	1	0.142857	286.494
UBE2E2	chr3	23244511	23633284	12	1	0.0833333	67.7704
SHB	chr9	37919131	38069208	1	1	1	14.3646
MTHFD1	chr14	64854749	64926722	1	1	1	109.022
CDKAL1	chr6	20534688	21232635	11	1	0.0909091	89.546
HDAC2	chr6	114254192	114332472	2	1	0.5	3571.1
ATM	chr11	108093211	108239829	4	1	0.25	128.063
CCDC41	chr12	94700225	94853764	3	1	0.333333	257.943
SH3BP5	chr3	15296360	15382875	1	1	1	63.2933
RP11-823P9.1	chr5	21341942	21544886	1	1	1	42.4995
GABRA3	chrX	151334706	151620337	1	1	1	23.6773
TMEM14D	chr10	70304246	70304590	1	1	1	168.01
TPM1	chr15	63334831	63364111	9	1	0.111111	6740.82
ZNF434	chr16	3432085	3451030	2	1	0.5	23.0895
NTF3	chr12	5541278	5630702	1	1	1	11.7721
KLHL15	chrX	24001837	24045303	1	1	1	44.9804
PLA2R1	chr2	160788519	160919121	2	1	0.5	30.0357
BBX	chr3	107241783	107530171	6	1	0.166667	293.187
CMC1	chr3	28283075	28366633	1	1	1	179.516
MFN2	chr1	12040238	12073571	2	1	0.5	1249.94
RAB17	chr2	238482965	238510257	1	1	1	43.4119
FAM188A	chr10	15820169	15902519	2	1	0.5	41.7731
SMARCA1	chrX	128580480	128657477	1	1	1	286.943
SMARCA5	chr4	144434616	144478639	2	1	0.5	1589.73
RERE	chr1	8412457	8877702	14	1	0.0714286	614.749
C13orf34	chr13	73302061	73330318	3	1	0.333333	59.8143
ZNF729	chr19	22469252	22499951	1	1	1	79.6028
NLGN1	chr3	173114074	174004434	5	1	0.2	14.7421
MED14	chrX	40507558	40595110	1	1	1	1315.37
CARD11	chr7	2945775	3083579	1	1	1	5.83534
C14orf39	chr14	60863187	60952814	1	1	1	14.7553
AP2A2	chr11	924894	1012239	1	1	1	7.2283
RP11-69I8.2	chr6	132223103	132241705	2	1	0.5	95.7663
CALD1	chr7	134429003	134655479	5	1	0.2	741.81
CTNNA2	chr2	79412357	80875905	17	1	0.0588235	22.8788
TOPBP1	chr3	133317019	133380737	1	1	1	319.067
ROCK2	chr2	11319887	11488456	2	1	0.5	507.169
TAF1	chrX	70586114	70752224	1	1	1	271.565
ZSCAN30	chr18	32831023	32870196	3	1	0.333333	73.3194
ADD2	chr2	70834750	70995357	3	1	0.333333	508.262
UNC13A	chr19	17712137	17799401	1	1	1	51.1884
LRRC16A	chr6	25279306	25620758	4	1	0.25	164.843
C1RL	chr12	7242183	7261869	2	1	0.5	7.09358
FMNL2	chr2	153191751	153506348	22	1	0.0454545	295.658
MPP2	chr17	41952725	41987068	1	1	1	10.7536
RP11-954J6.3	chrX	154695631	154841277	1	1	1	2.1566
MAGI1	chr3	65342053	66024509	33	1	0.030303	290.958
CYP51A1	chr7	91741465	91772266	2	1	0.5	252.948
GLO1	chr6	38643719	38670917	1	1	1	467.459
LUC7L2	chr7	139025105	139108198	5	1	0.2	544.519
FMO5	chr1	146646930	146714700	1	1	1	1.83763
SLC25A5	chrX	118602363	118605282	1	1	1	1369.22
FBXL7	chr5	15500305	15939900	13	1	0.0769231	63.0279
ZNF275	chrX	152599613	152618384	1	1	1	21.4237
PRSS23	chr11	86502101	86663886	1	1	1	4.41636
ZBTB20	chr3	114056941	114866118	3	1	0.333333	37.9123
PNRC2	chr1	24285599	24289952	2	1	0.5	483.915
ZNF75D	chrX	134382867	134478012	1	1	1	24.4186
LARGE	chr22	33561991	34318829	18	1	0.0555556	196.396
HELB	chr12	66696325	66737423	2	1	0.5	63.4566
RBAK	chr7	5023349	5112854	3	1	0.333333	141.523
NDRG2	chr14	21484922	21539031	1	1	1	56.3876
SEPT6	chrX	118749687	118827333	1	1	1	114.76
USP49	chr6	41762107	41863099	2	1	0.5	299.71
PCNXL2	chr1	233119881	233431459	7	1	0.142857	281.847
PPP6C	chr9	127908852	127952218	2	1	0.5	376.894
GSPT1	chr16	11961987	12010519	3	1	0.333333	127.74
RALGPS2	chr1	178694300	179065553	3	1	0.333333	160.754
PAX3	chr2	223064607	223163715	1	1	1	28.1305
WWC3	chrX	9983602	10112518	1	1	1	28.0656
UBE2Z	chr17	46985731	47006418	2	1	0.5	165.46
C11orf65	chr11	108179246	108338258	2	1	0.5	6.0723
AC074093.1	chr2	145425534	145940216	8	1	0.125	1.95388
MYO1C	chr17	1367480	1395995	1	1	1	11.268
MYO1B	chr2	192109911	192290115	6	1	0.166667	280.319
DOCK11	chrX	117629861	117820126	1	1	1	42.0335
C18orf25	chr18	43753988	43846954	4	1	0.25	37.2147
FHL2	chr2	105974169	106054960	2	1	0.5	39.6802
TSEN2	chr3	12525931	12581122	4	1	0.25	77.2268
RABEP1	chr17	5185558	5289129	2	1	0.5	154.96
MORF4L2	chrX	102930424	102943086	1	1	1	690.359
RPS24	chr10	79793518	79816570	2	1	0.5	5134.53
GPR64	chrX	19007427	19140755	1	1	1	21.0804
ATRX	chrX	76760378	77041702	1	1	1	983.414
RAB9A	chrX	13707244	13728625	1	1	1	74.0049
TBL1XR1	chr3	176737143	176915261	12	1	0.0833333	251.263
NUP54	chr4	77035812	77069668	2	1	0.5	421.011
C5orf30	chr5	102594403	102614361	1	1	1	30.5253
ASAP1	chr8	131064353	131455906	11	1	0.0909091	132.686
CDH11	chr16	64977656	65156101	5	1	0.2	9.92474
HS3ST5	chr6	114376750	114664209	8	1	0.125	13.4692
SNTB1	chr8	121547985	121825513	3	1	0.333333	29.4713
DIP2A	chr21	47878812	47989926	2	1	0.5	79.5879
DIP2B	chr12	50898768	51142450	1	1	1	44.7534
AC009429.1	chr3	21584308	21621451	8	1	0.125	56.5832
RP11-550F7.1	chr3	76483169	76484579	1	1	1	46.0983
CORO1C	chr12	109038885	109125372	1	1	1	321.511
RUNX1T1	chr8	92967203	93115514	5	1	0.2	163.935
ECT2	chr3	172468472	172539264	1	1	1	925.108
WASF3	chr13	27131840	27263085	3	1	0.333333	79.3485
SMARCB1	chr22	24129150	24176703	1	1	1	140.711
TTC39C	chr18	21572737	21715573	2	1	0.5	25.4766
KIAA0494	chr1	47124366	47184824	5	1	0.2	200.438
RP3-514P16.1	chrX	100792472	100794237	1	1	1	231.516
VAT1L	chr16	77822483	78014003	3	1	0.333333	104.466
POGZ	chr1	151375200	151431941	3	1	0.333333	501.282
ROD1	chr9	114980715	115095947	3	1	0.333333	324.987
CRIM1	chr2	36583069	36778278	12	1	0.0833333	67.5835
FAM160A1	chr4	152330368	152584784	1	1	1	99.9831
LDLRAD3	chr11	35965531	36253686	7	1	0.142857	59.3088
ATP9B	chr18	76829394	77138278	3	1	0.333333	36.5374
RP11-308B16.1	chr5	12574969	12804475	3	1	0.333333	28.553
VSIG10	chr12	118501398	118573831	2	1	0.5	79.0678
NDST1	chr5	149865381	149937773	2	1	0.5	17.4367
SCAMP1	chr5	77656339	77776562	6	1	0.166667	171.384
MTM1	chrX	149737069	149841795	2	1	0.5	30.4791
TSPAN6	chrX	99883667	99894988	1	1	1	406.523
CACNA2D1	chr7	81575760	82073114	8	1	0.125	251.443
ROBO2	chr3	75955846	77699115	6	1	0.166667	14.7072
GFRA1	chr10	117816444	118033126	1	1	1	14.97
GRIP1	chr12	66741211	67197966	5	1	0.2	17.9786
RNF4	chr4	2463947	2627047	2	1	0.5	289.815
EPT1	chr2	26531415	26618759	3	1	0.333333	129.751
DPPA4	chr3	109044988	109056419	2	1	0.5	2297.13
ASXL2	chr2	25960557	26101385	2	1	0.5	699.666
RNF220	chr1	44870866	45117396	6	1	0.166667	87.4409
ZBTB33	chrX	119384607	119392251	1	1	1	59.6021
TPP2	chr13	103249353	103331521	4	1	0.25	271.36
C3orf52	chr3	111805182	111849851	2	1	0.5	44.5756
NHSL2	chrX	71130938	71363424	1	1	1	3.05365
ANKRD27	chr19	33087907	33166102	2	1	0.5	77.4632
LRIG1	chr3	66429221	66551687	3	1	0.333333	207.704
RBPMS	chr8	30241944	30429778	10	1	0.1	590.107
NUP153	chr6	17615269	17706818	3	1	0.333333	454.462
BRWD3	chrX	79926353	80065187	1	1	1	335.433
ASCC3	chr6	100956070	101329248	1	1	1	532.403
RNF216L	chr7	5013619	5080306	1	1	1	141.523
VBP1	chrX	154425284	154468098	1	1	1	374.813
SMCHD1	chr18	2655886	2805015	3	1	0.333333	16.2949
EPHA4	chr2	222282747	222438922	2	1	0.5	88.6981
SORL1	chr11	121322912	121504387	2	1	0.5	145.794
TMED3	chr15	79603404	79704334	1	1	1	29.3321
TBC1D4	chr13	75858808	76056250	1	1	1	57.7376
C4orf37	chr4	98105244	99064391	1	1	1	2.35655
FGF13	chrX	137713735	138304939	1	1	1	34.7146
RP11-416K24.2	chr1	182305136	182305475	1	1	1	32.6875
TCEAL4	chrX	102831159	102842657	1	1	1	1818.1
PDZRN3	chr3	73431584	73674091	3	1	0.333333	54.746
AC000120.8	chr7	91741473	91808845	2	1	0.5	252.948
NXT2	chrX	108779010	108787919	1	1	1	42.2199
RNF144A	chr2	7057523	7208417	1	1	1	27.5043
TMLHE	chrX	154719776	154899605	1	1	1	57.4378
RAB39B	chrX	154487526	154493874	1	1	1	22.1138
KCTD9	chr8	25285366	25315992	5	1	0.2	129.331
VCAN	chr5	82767284	82878122	7	1	0.142857	833.959
RP11-181C21.4	chr1	78276507	78277621	1	1	1	249.763
LATS2	chr13	21547171	21635718	4	1	0.25	121.851
ODZ3	chr4	183065140	183724177	11	1	0.0909091	157.346
PRPS2	chrX	12809474	12842341	1	1	1	88.4569
LONRF1	chr8	12579403	12613582	1	1	1	187.406
BEX4	chrX	102470020	102472174	1	1	1	205.706
CLASP2	chr3	33537737	33759848	4	1	0.25	312.717
RRAGB	chrX	55744172	55785207	1	1	1	122.654
AAK1	chr2	69688532	69901481	4	1	0.25	134.764
GPC6	chr13	93879095	95055812	10	1	0.1	20.2335
BBS9	chr7	33168856	33645680	6	1	0.166667	182.768
PCDH7	chr4	30722037	31144728	5	1	0.2	102.385
WDSUB1	chr2	160092304	160143310	2	1	0.5	28.316
UPF3B	chrX	118967985	118986961	1	1	1	712.069
TARBP1	chr1	234527059	234614849	1	1	1	175.715
PTPRD	chr9	8314246	10612723	8	1	0.125	158.163
DKC1	chrX	153991031	154005964	1	1	1	905.895
SPATA5	chr4	123844229	124235809	6	1	0.166667	163.053
