# Supplementary material for: Allele-Biased Expression in Differentiating Human Neurons: Implications for Neuropsychiatric Disorders
Source: PLoS One. 2012 Aug 30;7(8):e44017. doi: 10.1371/journal.pone.0044017 (PMC3431331; doi:10.1371/journal.pone.0044017)
Supplement: Table S4 — SZ and ASD genes showing allele-biased expression in iPSCs and neurons (from Allen Brain Atlas list of 883 SZ and 244 ASD candidate genes). (XLSX) [file pone.0044017.s006.xlsx]

## Sheet: Sheet1
iPSC	neuron		SZ genes	Autism genes		SZ candidates in iPSC	ASD candidates in iPSC		SZ candidates in SZ	ASD candidates in ASD
EDA	gene		AANAT	A2BP1		AP3B1	NLGN4X		NRG3	NLGN4X
AC124303.3	FGF13		ABAT	ABAT		ACSL4	ARNT2		NRG1	CNTN4
GPC4	DACH2		ABCA13	ACCN1		NRG3	SEMA5A		GRIA3	DAB1
USP9X	GPM6B		ABCB1	ADA		NRXN1	NRXN1		LSAMP	CTNNA3
KAL1	RBFOX1		AC113554.2	ADAM23		LSAMP	CNTN4		CTNNA2	ACCN1
GPM6B	NLGN4X		ACE	ADCYAP1		MTHFD1	NLGN1		ERBB4	NLGN1
RP13-188A5.1	PTPRD		ACOX1	ADORA2A		NTF3	GLO1		NPAS3	LARGE
XIAP	CNTN4		ACP1	ADRA2A		CTNNA2	LARGE		NTRK2	IL1RAPL1
RP11-129K20.2	NRG3		ACSL4	ADRA2B		MAGI1	RAB39B		GPC6	CNTNAP2
CHM	NRG1		ACSL6	ADRB2		ZBTB20			MAGI2	IMMP2L
CASK	DAB1		ACSM1	ADSL		PAX3			GRIK3	APC
RP11-83M16.6	TBL1X		ACTN2	AGAP1		GFRA1			YWHAE	PARK2
STAG2	CASK		ADA	AGTR2		GRIP1			CACNA1A	NBEA
MEG3	SOX5		ADAM12	AHI1		TPP2			IRS1	RFWD2
NLGN4X	ODZ2		ADCYAP1	ALDH5A1		NUP153			UNC5C	FHIT
RP11-434D9.1	WDR44		ADH1B	ALOX5AP		SMCHD1			CSNK1E	GALNT13
P4HA2	LPP		ADORA2A	ANKRD11		GPC6			INPP4B	DPP10
XIST	RP11-622K12.1		ADRA1A	APC					FKBP5	NRXN1
SMS	GRIA3		ADRA2A	AR					ARHGEF10	DISC1
RBMS1	EYA2		ADRBK2	ARNT2					GSTO1	FYN
EIF2S3	LSAMP		ADSL	ARX					FLNB	SLC9A9
TBL1X	RP13-188A5.1		ADSS	ASL					GLS	SUCLG2
LRRTM4	CHM		AGAP1	ASMT					ATE1	STK39
HS6ST2	AKAP6		AGER	ASS1					NRXN1	RAB39B
CSMD2	ENOX1		AGPAT1	ASTN2					DISC1	PCDH9
FBXW8	CELF2		AGT	ATP10A					EGLN1	GRIN2A
KIAA1267	XIAP		AHCY	AUTS2					NTF3
POLA1	TRPS1		AHI1	AVPR1A					ENO1
CD99L2	EDA		AIF1	BZRAP1					FYN
PSD3	LRRTM3		AK1	C3orf58					PRKCA
RBM41	CTNNA2		AKT1	CA3					TPP2
ZNF385D	CTNNA3		AL021546.2	CA6					MAGI1
AP3B1	GPR173		ALDH1A1	CACNA1C					TCP1
SPINK5	CTNND2		ALDH1A2	CACNA1D					ZBTB20
RP11-479I1.4	DOCK11		ALDH1A3	CACNA1F					GRIA1
ACSL4	GLIS3		ALDH5A1	CACNA1G					GRIA4
APOOL	STAG2		ALK	CACNA1H					PLXNA2
RP3-399L15.3	BAI3		ANK3	CADM1					PDE4B
PCSK5	LRRTM4		ANKHD1	CADPS2					DRD2
RP11-266F12.1	MEG3		ANKK1	CBS					ARHGAP21
DLG2	DRP2		ANKRD12	CCDC64					ACSL4
METTL13	DCC		AP000843.1	CD44					GRIP1
OFD1	ERC2		AP3B1	CDH10					PTGFRN
TMEM53	C9orf93		AP3B2	CDH22					GFRA2
MAEA	CLSTN2		AP3D1	CDH9					FGF2
SLITRK4	CENPI		AP3M1	CDKL5					SMCHD1
DEPDC1B	RBM41		AP3M2	CEP290					FGF14
GK	ACCN1		APOD	CHRNA3					GRIN2A
ZNF677	ELMO1		APOE	CNR1
L2HGDH	SHISA9		APOL1	CNTN4
TRAPPC2	DOCK4		APOL2	CNTNAP2
GPR113	NLGN1		APOL4	CTNNA3
CAPZB	RP11-689K5.3		APOL5	CUX1
RP11-296E7.1	KCNB2		APOL6	CYP11B1
CHKA	ERBB4		APP	DAB1
WDR44	UTRN		AQP4	DAPK1
CCT3	LARGE		ARC	DCUN1D1
PSMG1	ARHGAP6		AR	DCX
OPCML	VAT1L		ARHGAP18	DDC
RP11-622K12.1	PTK2		ARHGAP21	DDX11
FRAS1	EPB41L3		ARHGEF10	DHCR7
THSD4	IL1RAPL1		ARMC3	DIAPH3
FAM199X	NPAS3		ARNTL2	DISC1
RPRD2	CNTNAP2		ARNTL	DLGAP2
ARNT2	LDLRAD3		ARRB2	DLX1
GSTO2	NTRK2		ARSA	DLX2
C5orf17	NAV2		ARVCF	DLX5
ZNRF3	SORCS3		ASCL1	DMD
TTC37	SLC16A2		ASPM	DMPK
GOSR2	ODZ4		ASTN1	DPP10
KIAA1370	GPC6		ATE1	DPP6
TPI1P1	FAM190A		ATF4	DPYD
SMAD2	TMLHE		ATF5	DRD3
SHROOM2	ARHGAP17		ATF7IP	DVL1
AMMECR1L	PTPRN2		ATN1	DYX1C1
AKAP13	ARHGAP19		ATP2B2	EGR2
NDUFAF2	CTD-2541M15.1		ATP6V1G2	EIF4E
LHFPL1	MGST1		ATXN1	EN2
AC108058.1	XIST		ATXN3	ESR1
LCOR	SOBP		AZIN1	ESR2
ELL2	FRAS1		BAG3	ESRRB
PARVA	ZMIZ1		BASP1	EXT1
SPATS2L	KCNH7		BAT1	F13A1
WBSCR17	C5orf17		BAT2	FABP5
TCFL5	RP3-449O17.1		BCL2L11	FABP7
PLCL2	ZNF423		BCL2L13	FBXO33
CXorf24	PAG1		BDNF	FBXO40
C3orf17	SLC2A13		BHLHE41	FEZF2
TAF1B	AKAP12		BIK	FHIT
GEMIN8	CD99L2		BIN3	FLT1
SEMA5A	MAGI2		BLOC1S1	FMR1
BMPR1A	USP9X		BLOC1S2	FOXP2
AC005062.2	NTM		BLOC1S3	FRK
ATAD2B	AP1S2		BMP6	FYN
CAT	AEBP2		BRD1	GABRA2
ARL10	EIF2S3		BRUNOL5	GABRA4
ZNF492	PDE1A		BSG	GABRA5
AP1S2	IMMP2L		BTBD9	GABRA6
OPHN1	RP11-761E20.1		C10orf120	GABRB1
KIF4A	LIPI		C18orf1	GABRB3
AC005042.4	BAZ1A		C1orf198	GABRG1
RP5-964N17.1	CCDC41		C1QTNF6	GABRG3
EFR3A	HS6ST2		C2orf86	GABRP
KLF8	APC		C4A	GABRR1
CCT8P1	HIPK2		C6	GABRR2
DMXL1	KHDRBS3		CABIN1	GALNT13
AL132709.9	CNTN5		CACNA1A	GLO1
AL132709.8	PRKG1		CACNA1C	GLRA1
C9orf156	NCAM2		CACNA1F	GLRA2
ANK2	CAMTA1		CALCA	GLRA3
C9orf93	DYNC2H1		CALM2	GLRB
FUT9	ATM		CALY	GRIK2
ZNF397	SH3BP5		CAMK2A	GRIN2A
RP11-570P14.1	AC087590.3		CANX	GRINL1A
TUSC3	MCART6		CAP2	GRM6
HNRPLL	TTC28		CAPZA2	GRM8
RCBTB1	KIAA1267		CARTPT	GRPR
RP11-761E20.1	GRIK3		CASP10	GSTM1
MIPEP	SMARCA1		CBS	HLA-A
DYRK1A	SEMA6D		CCDC141	HLA-DRB1
ZFP64	RERE		CCDC60	HOXA1
C2orf56	YWHAE		CCKAR	HRAS
SPIN3	TANC1		CCKBR	HSD11B1
JAKMIP2	ROD1		CCK	HTR1B
CEP192	SCML2		CCL2	HTR3A
CGNL1	MCC		CCR5	HTR3C
CACHD1	AFF2		CD14	HTR7
NRG3	TPD52		CD3D	ID2
PTTG1IP	CACNA1A		CD48	IL1RAPL1
NRXN1	RORA		CD4	IMMP2L
LSAMP	RP11-954J6.3		CDC42SE2	INPP1
PAK2	C21orf34		CDC45L	ITGA4
YIPF6	RBBP8		CDK5	ITGB3
FAM73A	IRS1		CECR2	ITGB7
CNTN4	PARK2		CELSR1	JMJD1C
RP3-368A4.3	RP11-624C23.1		CFB	KCNMA1
EXO1	SUMF1		CFLAR	KCNN3
PRKG1	RNF130		CHAT	KIAA1586
CAMTA1	FNDC3B		CHGA	LAMB1
PDE5A	EPHB1		CHGB	LARGE
FARP1	UNC5C		CHI3L1	LRFN5
UBE2E3	WWOX		CHL1	LRP8
UBE2E2	MAN2A1		CHN2	LRRC1
SHB	PPP2R5E		CHODL	LRRN3
MTHFD1	DPF3		CHRFAM7A	LZTS2
CDKAL1	THSD7B		CHRM1	MAOA
HDAC2	SNX13		CHRM5	MAP2
ATM	CSNK1E		CHRNA2	MARK1
CCDC41	TSEN2		CHRNA3	MBD1
SH3BP5	SLC8A1		CHRNA4	MBD3
RP11-823P9.1	MTMR7		CHRNA5	MBD4
GABRA3	RP11-434D9.1		CHRNA7	MBP
TMEM14D	ODZ3		CHRNB2	MCPH1
TPM1	DIP2A		CHRNB3	MDGA2
ZNF434	RP11-479I1.4		CIT	MECP2
NTF3	SRRM4		CLDN10	MET
KLHL15	ABCC4		CLDN11	MTF1
PLA2R1	CRIM1		CLDN14	MYO16
BBX	INPP4B		CLDN5	NBEA
CMC1	SLCO3A1		CLINT1	NCAM1
MFN2	CACNA2D1		CLOCK	NDNL2
RAB17	ROBO2		CNO	NF1
FAM188A	NBEA		CNP	NLGN1
SMARCA1	CTNNBL1		CNR1	NLGN3
SMARCA5	PRKCE		CNTF	NLGN4X
RERE	PAK2		CNTN1	NOS2
C13orf34	RFWD2		CNTN2	NPAS2
ZNF729	APOOL		COG2	NPY1R
NLGN1	MAPK10		COMT	NPY5R
MED14	SGCD		COX6A1	NR3C1
CARD11	TBL1XR1		CPLX1	NRCAM
C14orf39	FHAD1		CPLX2	NRP2
AP2A2	CNTN3		CPXM2	NRXN1
RP11-69I8.2	KALRN		CREBL1	NTF4
CALD1	CNTNAP5		CRY2	NTNG1
CTNNA2	NCKAP5		CSF2RA	NTRK1
TOPBP1	FAM155A		CSF2RB	NTRK3
ROCK2	ATXN7L1		CSNK1D	ODF3L2
TAF1	RRAGB		CSNK1E	OMG
ZSCAN30	USP10		CSNK2A1	OPRM1
ADD2	PTPRG		CSPG5	OR1C1
UNC13A	PTPRM		CTLA4	OXTR
LRRC16A	FHIT		CTNNA1	PARK2
C1RL	LASS6		CTNNA2	PCDH10
FMNL2	TMCO3		CYP1A2	PCDH9
MPP2	CDRT4		CYP21A2	PENK
RP11-954J6.3	FKBP5		CYP26B1	PER1
MAGI1	RP11-266F12.1		CYP26C1	PIK3CG
CYP51A1	UBAC2		CYP2C18	PITX1
GLO1	SEC23IP		CYP2D6	PLAUR
LUC7L2	SEMA4D		CYP2E1	PLN
FMO5	SEMA3C		CYP3A4	PON1
SLC25A5	ZNF879		CYP3A5	PRKCB
FBXL7	PSMD6		CYP4F8	PTCHD1
ZNF275	APBB2		DAAM1	PTEN
PRSS23	ATRNL1		DAAM2	PTGS2
ZBTB20	MTMR12		DAOA	RAB39B
PNRC2	FAM3A		DAO	RAI1
ZNF75D	METTL13		DBH	RAPGEF4
LARGE	C3orf17		DBI	RB1CC1
HELB	ARHGEF10		DBP	REEP3
RBAK	PPHLN1		DCDC2	RELN
NDRG2	SLITRK4		DDC	REST
SEPT6	AP1M1		DDO	RFWD2
USP49	SP1		DDR1	RHOXF1
PCNXL2	KIAA1244		DGCR14	RIMS3
PPP6C	BCAT1		DGCR2	RPL10
GSPT1	MTUS2		DGCR6	RPS6KA2
RALGPS2	RAB9B		DGCR6L	SCN1A
PAX3	GK		DGCR8	SCN2A
WWC3	GALNT13		DISC1	SCN2B
UBE2Z	ZNF677		DKK1	SCN3A
C11orf65	GTF2F2		DKK4	SDC2
AC074093.1	TRAPPC3		DLG1	SEMA5A
MYO1C	CCND2		DLG4	SEZ6L2
MYO1B	RHBDD1		DLGAP1	SLC1A1
DOCK11	FDX1		DLX1	SLC1A6
C18orf25	DCHS1		DNMT3B	SLC25A12
FHL2	ZNF630		DPM1	SLC4A10
TSEN2	RP11-509J21.1		DPYSL2	SLC6A11
RABEP1	NUAK1		DRD1	SLC6A12
MORF4L2	PDS5B		DRD2	SLC6A13
RPS24	IQSEC1		DRD3	SLC6A1
GPR64	C12orf35		DRD4	SLC6A4
ATRX	SWAP70		DRD5	SLC6A8
RAB9A	RP11-296E7.1		DTNBP1	SLC9A9
TBL1XR1	CHCHD3		DUSP6	ST7
NUP54	RWDD2B		DYNC1I2	STK39
C5orf30	APOO		DYNLL1	SUCLG2
ASAP1	AGPAT5		EBF3	SYPL1
CDH11	UBXN2B		EEF1E1	SYT17
HS3ST5	JAK1		EGF	TDO2
SNTB1	OPCML		EGFR	TH
DIP2A	KCNIP4		EGLN1	TMEM195
DIP2B	SDK1		EGR1	TPH2
AC009429.1	LMX1A		EGR2	TSC1
RP11-550F7.1	LIN28A		EGR3	TSC2
CORO1C	COL4A2		EGR4	TSN
RUNX1T1	COL4A1		EHMT2	UBE2H
ECT2	RPRD2		EIF2B1	UBE3A
WASF3	GSTO1		EIF2B2	VASH1
SMARCB1	ZNRF3		EIF2B3	VIPR2
TTC39C	RP11-679C8.2		EIF2B4	WNT2
KIAA0494	CTC-358I24.1		EIF2B5	XPC
RP3-514P16.1	MTHFD1L		ENKUR
VAT1L	RP11-726G1.1		ENO1
POGZ	TTC37		ENO2
ROD1	GOSR2		EPHA6
CRIM1	FLNB		ERBB2
FAM160A1	CACNA1B		ERBB3
LDLRAD3	MYH10		ERBB4
ATP9B	TPI1P1		ESD
RP11-308B16.1	SESN1		ESR1
VSIG10	RCAN2		ESR2
NDST1	SHROOM3		FAAH
SCAMP1	SHROOM2		FABP3
MTM1	EML4		FABP7
TSPAN6	MTFR1		FAM126B
CACNA2D1	GLS		FAM19A5
ROBO2	AP1AR		FAM3B
GFRA1	MAP4K4		FAM83F
GRIP1	PELI2		FAM8A1
RNF4	P2RY14		FBP1
EPT1	CROCCP3		FCRL3
DPPA4	PYROXD1		FEZ1
ASXL2	SMC6		FGA
RNF220	RBM10		FGF14
ZBTB33	ATE1		FGF18
TPP2	TM9SF2		FGF1
C3orf52	LCOR		FGF20
NHSL2	BRWD3		FGF22
ANKRD27	IARS		FGF2
LRIG1	RP11-402J6.1		FGFBP1
RBPMS	TCFL5		FGFR1
NUP153	AUH		FGFR2
BRWD3	ZNF81		FGFR3
ASCC3	PLCL2		FGFR4
RNF216L	MGA		FKBP1A
VBP1	FRMPD4		FKBP5
SMCHD1	FRMPD3		FLNB
EPHA4	CXorf24		FMO3
SORL1	OFD1		FN1
TMED3	RGS17		FOXP2
TBC1D4	TAF1B		FXN
C4orf37	GEMIN8		FXYD1
FGF13	LRIG1		FXYD2
RP11-416K24.2	TAF1D		FXYD5
TCEAL4	CCDC117		FXYD6
PDZRN3	LMO3		FYN
AC000120.8	ADARB2		FZD3
NXT2	GEMIN4		FZD4
RNF144A	SPAG17		GABBR1
TMLHE	RUNX1T1		GABRA1
RAB39B	PRKD1		GABRA2
KCTD9	C9orf46		GABRA5
VCAN	FAM59A		GABRA6
RP11-181C21.4	ANKH		GABRB2
LATS2	GEN1		GABRE
ODZ3	OSGEP		GABRG2
PRPS2	ARL15		GABRP
LONRF1	SGMS1		GAD1
BEX4	CTNNAL1		GAD2
CLASP2	DDX17		GAL3ST1
RRAGB	PPFIA1		GALC
AAK1	OPHN1		GAP43
GPC6	KLF7		GAPDH
BBS9	YLPM1		GC
PCDH7	NEO1		GCLM
WDSUB1	SLIT2		GDNF
UPF3B	SLIT1		GFAP
TARBP1	ARFIP1		GFRA1
PTPRD	HEATR3		GFRA2
DKC1	AC124997.1		GFRA3
SPATA5	ITGB8		GFRA4
	CCT8P1		GH1
	FGFR1OP		GJA5
	MOBKL1A		GJA8
	SUFU		GJC2
	RP11-285G1.8		GJD2
	EIF4E2		GLS
	SLC35F3		GLUL
	PRCC		GMPR
	MBD5		GNAL
	ZNF543		GNAO1
	WDR70		GNAS
	FUT9		GNAZ
	SNORA23		GNB1L
	RP11-570P14.1		GNB3
	SNORA29		GNPAT
	TSPAN13		GNRH1
	CDO1		GOT2
	LRRC40		GP6
	NOSTRIN		GPC6
	RCBTB1		GPM6A
	RAD23B		GPR158
	FBLN7		GPR78
	KIAA1797		GRB2
	DNTTIP2		GRIA1
	C20orf94		GRIA2
	ADAMTS3		GRIA3
	RP11-275E10.1		GRIA4
	NFE2L2		GRID1
	CCDC15		GRIK1
	ESRP1		GRIK2
	AL354696.2		GRIK3
	SORCS1		GRIK4
	DYRK1A		GRIK5
	RP11-56P2.2		GRIN1
	JAKMIP3		GRIN2A
	JAKMIP2		GRIN2B
	DPP10		GRIN2C
	MRPL33		GRIN2D
	AC073263.4		GRIN3A
	CTC-348L14.1		GRIP1
	CEP192		GRM3
	RINT1		GRM4
	PROM1		GRM5
	CHFR		GRM7
	SPINK5		GRM8
	PTGES3		GSC2
	SYT1		GSK3B
	NRXN1		GSN
	GNG2		GSS
	TIAL1		GSTM1
	PCDH19		GSTO1
	PAK7		GSTP1
	WNT7A		GSTT2B
	YIPF6		GTF2H4
	FOXP1		HAL
	AC073871.2		HIRA
	FAM73A		HIST1H2AH
	CNTN6		HIST1H2BJ
	CRADD		HK1
	NEK4		HMBS
	KIAA0802		HMX3
	TCP11L1		HNMT
	DISC1		HOMER1
	CCDC90A		HOMER2
	PLXDC2		HOMER3
	SHFM1		HORMAD2
	JAM3		HRH1
	RP11-245J9.4		HRH2
	NUDT6		HS3ST2
	UBE2E2		HS6ST3
	UBE2CBP		HSD17B7
	EGLN1		HSPA12A
	RP1-102H19.6		HSPA1A
	FAM78B		HSPA1B
	MEF2A		HSPA1L
	STIM2		HSPA5
	PCDH15		HTR1A
	COX10		HTR1B
	TRIM2		HTR1D
	TMEM135		HTR2A
	HDAC8		HTR2C
	RFC3		HTR3A
	SAMD4A		HTR3B
	ZNF295		HTR3C
	CBX1		HTR3D
	RP11-385J1.2		HTR3E
	TMEM14D		HTR4
	PRIMA1		HTR5A
	RP3-514P16.1		HTR6
	ZNF345		HTR7
	MYT1L		HTT
	TMEM164		ICAM1
	SRP72		IGF1
	ZNF438		IGF1R
	NTF3		IGF2
	MAPK4		IGFBP3
	POGK		IL10
	PLA2R1		IL10RA
	RP11-397P14.3		IL12A
	ENO1		IL12B
	DMXL1		IL17RA
	MERTK		IL18BP
	C11orf65		IL18
	DOCK5		IL18R1
	ZNF800		IL18RAP
	TAOK1		IL1A
	CXADR		IL1B
	TDRKH		IL1RN
	NCK2		IL2
	RP11-33B1.1		IL2RB
	UNC80		IL3
	STX6		IL4
	SFRP2		IL4R
	SHOC2		IL6
	PARD3B		IL6R
	RP11-420A23.1		IL9
	POLA1		IMPA2
	SVIL		INA
	EPC2		INPP1
	ERCC5		INPP4A
	PRDX1		INPP4B
	ZNF711		INPP5A
	LIMS1		INPP5D
	RNF32		INPP5J
	CTB-157D17.1		INPPL1
	UIMC1		IPO5
	SEPT6		IRS1
	LRRC8C		ITGA3
	RAD54B		ITSN1
	ARHGAP42		JAG1
	C6orf106		JAG2
	FYN		JARID2
	ANK2		KCNH2
	FNBP1L		KCNH5
	MAT2B		KCNN3
	PRKCA		KIAA1217
	TPP2		KIF13A
	C14orf39		KIF2A
	CHRM2		KIF5A
	MGAT5		KLF5
	COL24A1		KLK8
	CALD1		KMO
	DPH3		KPNA3
	MIR181A2HG		KREMEN1
	TOPBP1		LGI1
	TBC1D22A		LHPP
	TAF1		LIF
	ARHGAP32		LMOD1
	ZNF793		LSAMP
	FER		LSM2
	RPS6KA6		LST1
	FBXO18		LTA
	ZFR		LTB
	TCEAL4		MAG
	CHN1		MAGI1
	SLC30A8		MAGI2
	GPR34		MAGI3
	DCAF10		MAL
	LINGO2		MANBA
	AC087859.1		MAOA
	EML1		MAOB
	MPP7		MAP1A
	CCDC91		MAP4
	CCDC93		MAP6
	PSD3		MAPK14
	ENSA		MAPK8IP2
	MAGI1		MAPT
	NUP214		MAT1A
	WDR67		MBP
	SHC4		MC5R
	TCP1		MCHR1
	ANKRD46		MCHR2
	FMO5		MCTP2
	AC093415.2		MDGA1
	MCF2L2		MDH1
	CREB5		MED12
	PRMT7		MED15
	SLC25A5		MEGF10
	CLCN4		MET
	FLRT2		MFRP
	SLC25A24		MICB
	RP11-3B12.1		MIF
	GPATCH2		MITF
	XKR4		MLC1
	PLD5		MLLT10
	DZIP3		MMP3
	NKAIN2		MMP9
	ZNF275		MOBP
	ARAF		MOG
	ZBTB20		MOV10L1
	RP11-778J15.1		MPPED1
	GRIA1		MPZ
	KAT2B		MPZL1
	GRIA4		MRPL38
	PDIA6		MSRA
	ALPK2		MSRB2
	FAM13A		MTHFD1
	KIAA1429		MTHFR
	TNFRSF19		MUTED
	MAML2		MYB
	HSPH1		MYH9
	NCALD		MYLIP
	SLC25A13		MYO18B
	GLDC		MYO9B
	SLC9A9		MYOZ1
	THADA		MYT1
	TRPM3		NAT1
	MAP1B		NCAM1
	PARP8		NCOA7
	KIAA0196		NCR3
	TSHZ2		NCSTN
	KLHL15		NDE1
	LAMC2		NDEL1
	PTPN2		NDRG1
	ZFAT		NDUFV2
	NCRNA00115		NEFL
	RBFOX3		NEFM
	LRBA		NEU4
	SH3BGRL2		NEUROG1
	RP11-758M4.1		NFIL3
	PTCD3		NFKBIL1
	TPRG1L		NGF
	MELK		NGFR
	SHQ1		NOS1AP
	FGGY		NOS1
	LDB2		NOS3
	RP1-80B9.2		NOTCH1
	FAM199X		NOTCH2
	WDYHV1		NOTCH3
	MYO1D		NOTCH4
	FBXO8		NPAS2
	THSD7A		NPAS3
	CDH8		NPSR1
	PDE3A		NPTN
	SNRNP35		NPY
	ARL1		NQO1
	STOX1		NQO2
	RABGAP1		NR1D1
	PTPN4		NR2E1
	MORF4L2		NR3C1
	UGGT1		NR3C2
	GALNTL4		NR4A1
	COL4A3BP		NR4A2
	EFNA1		NR4A3
	RP11-384F7.2		NRG1
	APPL2		NRG2
	PLEKHM3		NRG3
	MAST4		NRG4
	ATRX		NRGN
	ARL6		NRN1
	MAEA		NRXN1
	GALNT14		NRXN3
	NUP50		NTF3
	KCNJ6		NTNG1
	GALNT10		NTNG2
	NUP54		NTRK2
	PLXNA2		NTRK3
	RALYL		NTS
	UST		NTSR1
	TMTC2		NUMBL
	CTC-426B10.1		NUP153
	RILPL1		OGG1
	PDE4B		OLIG2
	HIBCH		OMG
	CCDC85A		OPRM1
	TMPO		P2RX7
	CAMK1D		PADI2
	DIP2B		PADI4
	TBC1D1		PAFAH1B1
	DNER		PAH
	RP11-550F7.1		PAICS
	CORO1C		PANX2
	BMPR1B		PAWR
	ENTPD4		PAX3
	RBMS1		PAX6
	MAP2K5		PCDH11X
	MAP2K4		PCDH11Y
	ZNF204P		PCDH8
	PEX14		PCDHGC3
	MID1		PCK1
	KLF12		PCK2
	PRICKLE2		PCM1
	SCAMP1		PCNT
	RGS7		PDE4B
	C2orf76		PDE4D
	NT5C2		PDE7B
	ESRRG		PDGFRA
	SMARCB1		PDGFRB
	SLC44A5		PDLIM2
	MSI2		PDLIM5
	PIGK		PDYN
	ATP1B3		PEBP4
	SUCLG2		PEMT
	GTPBP4		PENK
	MCM3		PER1
	TRAPPC2		PER2
	STK39		PER3
	DUSP16		PGAM1
	INO80C		PGBD1
	FAM154B		PGD
	C6orf138		PHF21B
	PCP4		PHGDH
	DRD2		PHOX2B
	RPA3		PI4K2B
	PDK3		PI4KA
	RP13-93L13.2		PI4KB
	CLMN		PICK1
	MFHAS1		PIK3C2A
	ZFAND3		PIK3C2B
	GDAP1L1		PIK3C2G
	ZFYVE1		PIK3C3
	AC136007.2		PIK3CB
	ZNF141		PIK3CD
	KDM4C		PIK3CG
	WWC3		PIK3R1
	CCDC88C		PIK3R2
	DGCR5		PIK3R3
	ARHGAP21		PIK3R4
	SMS		PIP5K1A
	ARHGAP24		PIP5K1B
	RP11-307P5.1		PIP5K1C
	PIR		PIP5K2A
	FAM19A4		PIP5K2B
	NUF2		PIWIL2
	MTM1		PLA2G1B
	DISP1		PLA2G4A
	KLHL4		PLA2G4C
	TSPAN6		PLA2G4D
	MYSM1		PLA2G6
	ADAMTS20		PLA2G7
	CACNA2D3		PLAA
	ADAM7		PLCB1
	KCNMB2		PLCB3
	WDR53		PLCE1
	EIF4G3		PLCG1
	ACSL3		PLDN
	CCNY		PLLP
	ACSL4		PLP1
	FAT3		PLUNC
	ROBO1		PLXNA2
	INADL		PMCH
	XRN1		PMP22
	ZNF568		PNOC
	GRIP1		PNPLA8
	C6orf225		PNPO
	SPC25		PON1
	EXOC4		POU3F1
	ZNF211		PPAPDC1A
	STMN2		PPARA
	METAP1		PPARD
	SHROOM4		PPARG
	DCLK1		PPIL2
	TRIM36		PPM1F
	FRMD3		PPP1R11
	FMN2		PPP1R1B
	BEX4		PPP2R2B
	C9orf3		PPP3CA
	DNM3		PPP3CB
	ARID4B		PPP3CC
	PTGFRN		PPP3R1
	CLASP2		PPP3R2
	PDHX		PRKCA
	CHD2		PRKCG
	ULK4		PRNP
	TUBA1C		PRODH
	ASXL3		PROZ
	RAC1		PRSS16
	AJAP1		PRX
	MED12L		PSAP
	CDC42EP3		PSEN1
	SLC35A1		PSEN2
	MYST1		PTAR1
	ZBTB33		PTEN
	C1orf132		PTGDS
	SPATA13		PTGFRN
	MTRF1		PTGS1
	TMEM98		PTGS2
	RP11-125B21.2		PTPRZ1
	PVT1		PVALB
	GFRA2		QKI
	TTC9		RANBP1
	NHSL1		RANBP9
	NHSL2		RAPGEF6
	ANKRD27		RASSF7
	ZNF827		RBM24
	NELL1		RBM9
	FGF2		RBP1
	TMEM66		RELA
	AMPH		RELN
	PEX2		RET
	TAF3		RGS10
	TNFAIP8		RGS4
	PRDM10		RGS9
	PLEKHA8		RHO
	AAK1		RORB
	TMEM68		RPGRIP1L
	BMPR1A		RPP21
	SNCA		RSRC1
	IPO7		RTN4
	KDM1B		RTN4R
	VBP1		RUNX1
	SMCHD1		RXRB
	RAD51L1		RYR3
	EPHA5		S100B
	EPHA3		SCGB1A1
	DGKB		SCRT2
	ME3		SELENBP1
	ME2		SEMA3A
	IDE		SEPSECS
	TBC1D9		2011-09-05
	NR6A1		SERPINA1
	RPL13A		SERPINA3
	ITGA9		SEZ6L
	C6orf163		SFRP1
	C6orf165		SH2D1B
	ZNF749		SHISA5
	C4orf37		SHMT1
	SRD5A1		SIGMAR1
	FGF14		SIL1
	LRRC8D		SIPA1L3
	RBPMS		SIRT5
	RBL2		SLC12A6
	FMN1		SLC15A1
	PDSS2		SLC17A7
	COL9A1		SLC18A1
	MAML3		SLC18A2
	RP11-416K24.2		SLC1A1
	UNC13A		SLC1A2
	ZNF518B		SLC1A3
	RNF150		SLC1A4
	METTL8		SLC1A5
	ZNF521		SLC1A6
	FHOD3		SLC22A4
	PKD2		SLC24A5
	GLB1		SLC25A12
	NXT2		SLC25A14
	PIAS1		SLC25A1
	PRKACB		SLC25A27
	BRE		SLC35B3
	AMOT		SLC39A14
	SGCE		SLC44A4
	NUP62CL		SLC6A1
	RAB39B		SLC6A2
	FAM18B2		SLC6A3
	CLEC16A		SLC6A4
	KCTD8		SLC6A5
	VCAN		SLC6A9
	ZNF254		SLIT3
	RP11-181C21.4		SMARCA2
	ZNF256		SMARCC1
	FRMD4A		SMCHD1
	ADAM19		SNAP25
	ACAD10		SNAP29
	CLPB		SNAPIN
	AC007254.3		SNCG
	MRPS28		SOD2
	CPNE8		SORBS3
	PRPS2		SOX10
	UPF3B		SP4
	PXK		SPARCL1
	GLI3		SPP1
	C1orf173		SPTAN1
	BIVM		SPTBN4
	MTA3		SREBF2
	PLS1		SRR
	LRP12		SST
	PDGFC		ST13
	GLIPR2		ST6GAL2
	TRAF5		ST8SIA2
	RP3-368A4.3		ST8SIA4
	RP11-364F11.1		STK24
	SNF8		STK4
	ARMC9		STX1A
	RUVBL1		STX7
	SSBP3		SULT4A1
	TTC39C		SYN2
	PCDH9		SYN3
	RNF165		SYNE1
	RP1-67M12.1		SYNGAP1
	TAB3		SYNGR1
	PTPRK		SYNJ1
	GPR64		SYP
	HAUS6		SYT11
	GRIN2A		TAAR1
	BRAF		TAAR2
	DKC1		TAAR5
	ATF6		TAAR6
	DTWD2		TAC1
			TACC2
			TACR3
			TAP2
			TBP
			TBX1
			TCERG1L
			TCF4
			TCP1
			TDO2
			TFAP2A
			TFAP2B
			TF
			TFRC
			TGFBR2
			TGM2
			TH
			TIMELESS
			TIMM17A
			TIMP3
			TMEM108
			TNF
			TNFRSF1B
			TNXB
			TP53
			TPH1
			TPH2
			TPP2
			TRAF3IP1
			TREM2
			TRMT2A
			TSC2
			TSNAX
			TSPAN8
			TSPO
			TTC13
			TTR
			TUBA1A
			TUBA8
			TXNDC5
			TYR
			TYROBP
			TYRP1
			UBE2L3
			UCP2
			UFD1L
			UGT8
			UHMK1
			UHRF1
			UNC5C
			USP46
			VAMP2
			VDR
			VGF
			VIPR1
			VIPR2
			VLDLR
			WFS1
			WNT2B
			WNT5A
			WNT7B
			WNT8A
			XBP1
			XRCC1
			YWHAB
			YWHAE
			YWHAG
			YWHAH
			YWHAZ
			ZBED4
			ZBTB20
			ZBTB9
			ZCCHC4
			ZDHHC8
			ZIC2
			ZNF181
			ZNF365
			ZNF471
			ZNF490
			ZNF74
			ZNF804A
			ZNF831
